# Supplementary material for: Novel pirfenidone derivatives: synthesis and biological evaluation
Source: Royal Society of Chemistry journal article supplement (doi:10.1039/d3md00072a), 2023-01-01

## Supporting Information

### catalogue

|                                                                |    |
|----------------------------------------------------------------|----|
| Figure S1. Compound <b>4</b> - <sup>1</sup> H NMR -DMSO .....  | 1  |
| Figure S2. Compound <b>4</b> - <sup>13</sup> C NMR -DMSO ..... | 1  |
| Figure S3. <b>5a</b> - <sup>1</sup> H NMR-DMSO .....           | 2  |
| Figure S4. <b>5a</b> - <sup>13</sup> C NMR-DMSO .....          | 2  |
| Figure S5. <b>5a</b> - <sup>13</sup> C NMR-MeDH .....          | 3  |
| Figure S6. <b>5b</b> - <sup>1</sup> H NMR-DMSO .....           | 4  |
| Figure S7. <b>5b</b> - <sup>13</sup> C NMR-DMSO .....          | 4  |
| Figure S8. <b>5c</b> - <sup>1</sup> H NMR-DMSO .....           | 5  |
| Figure S9. <b>5c</b> - <sup>13</sup> C NMR-DMSO .....          | 5  |
| Figure S10. <b>5d</b> - <sup>1</sup> H NMR-DMSO .....          | 6  |
| Figure S11. <b>5d</b> - <sup>13</sup> C NMR-DMSO .....         | 6  |
| Figure S12. <b>5e</b> - <sup>1</sup> H NMR-DMSO .....          | 7  |
| Figure S13. <b>5e</b> - <sup>13</sup> C NMR-DMSO .....         | 7  |
| Figure S14. <b>5f</b> - <sup>1</sup> H NMR-DMSO .....          | 8  |
| Figure S15. <b>5f</b> - <sup>13</sup> C NMR-DMSO .....         | 8  |
| Figure S16. <b>5g</b> - <sup>1</sup> H NMR-DMSO .....          | 9  |
| Figure S17. <b>5g</b> - <sup>13</sup> C NMR-DMSO .....         | 9  |
| Figure S18. <b>5a</b> -HRMS .....                              | 10 |
| Figure S19. <b>5b</b> -HRMS .....                              | 10 |
| Figure S20. <b>5c</b> -HRMS .....                              | 11 |

|                                   |    |
|-----------------------------------|----|
| Figure S21. <b>5d</b> -HRMS ..... | 11 |
| Figure S22. <b>5e</b> -HRMS ..... | 12 |
| Figure S23. <b>5f</b> -HRMS ..... | 12 |
| Figure S24. <b>5g</b> -HRMS.....  | 13 |

Figure S1. Compound 4-<sup>1</sup>H NMR -DMSO

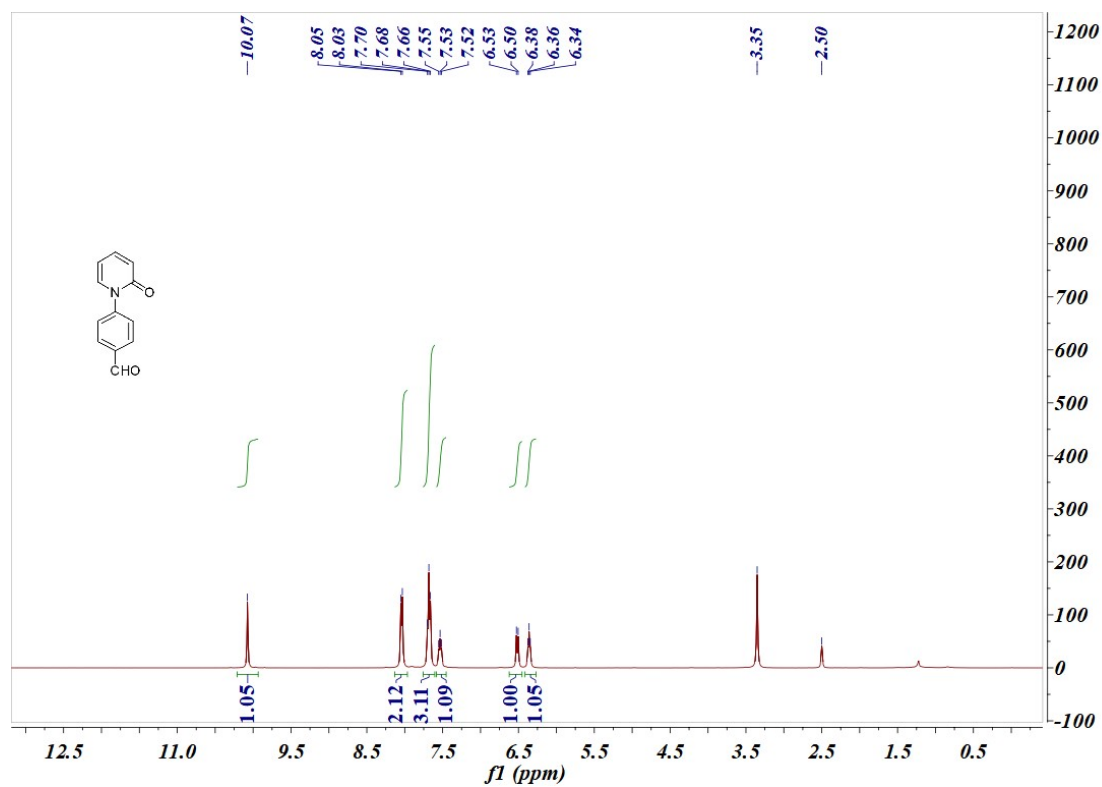

Figure S2. Compound 4-<sup>13</sup>C NMR -DMSO

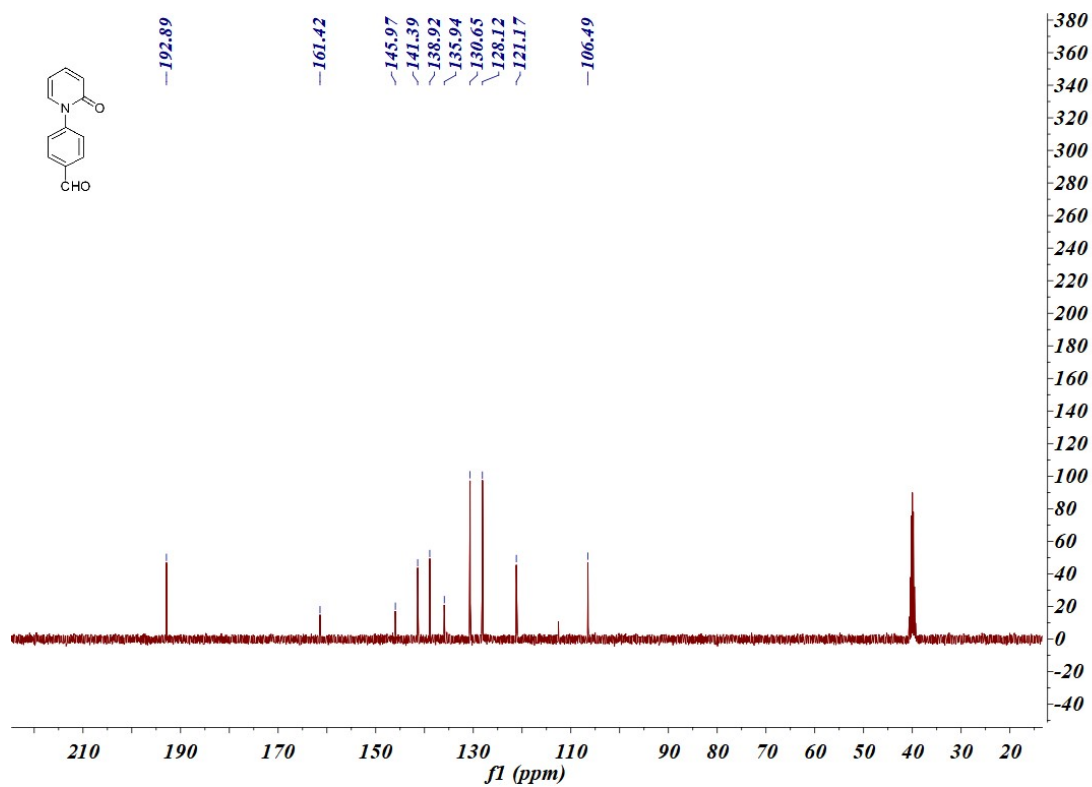

Figure S3.5a-<sup>1</sup>H NMR-DMSO

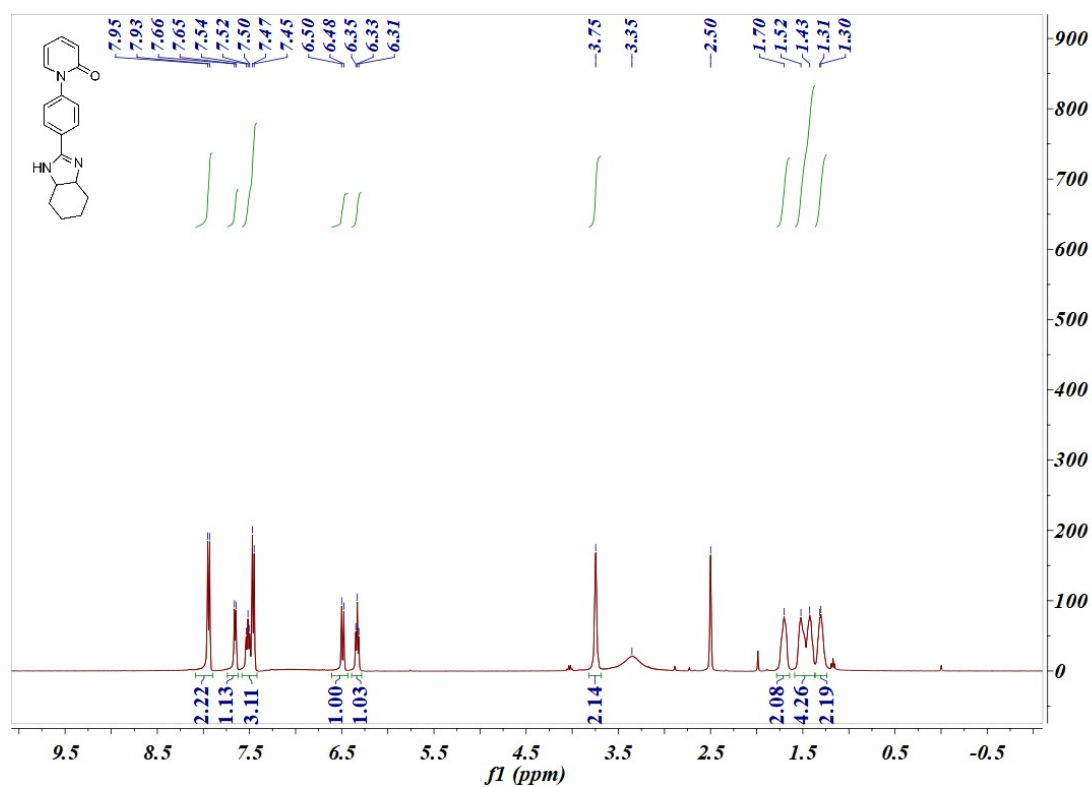

Figure S4.5a-<sup>13</sup>C NMR-DMSO

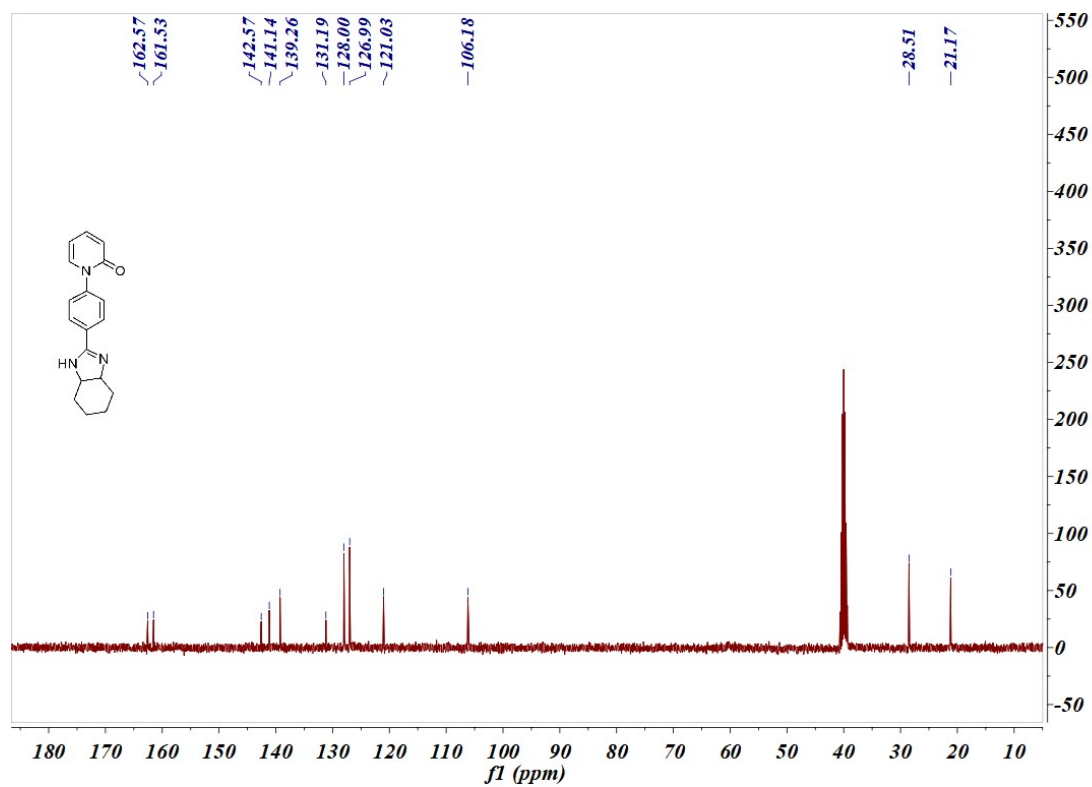

Figure S5.5a-<sup>13</sup>C NMR-MeDH

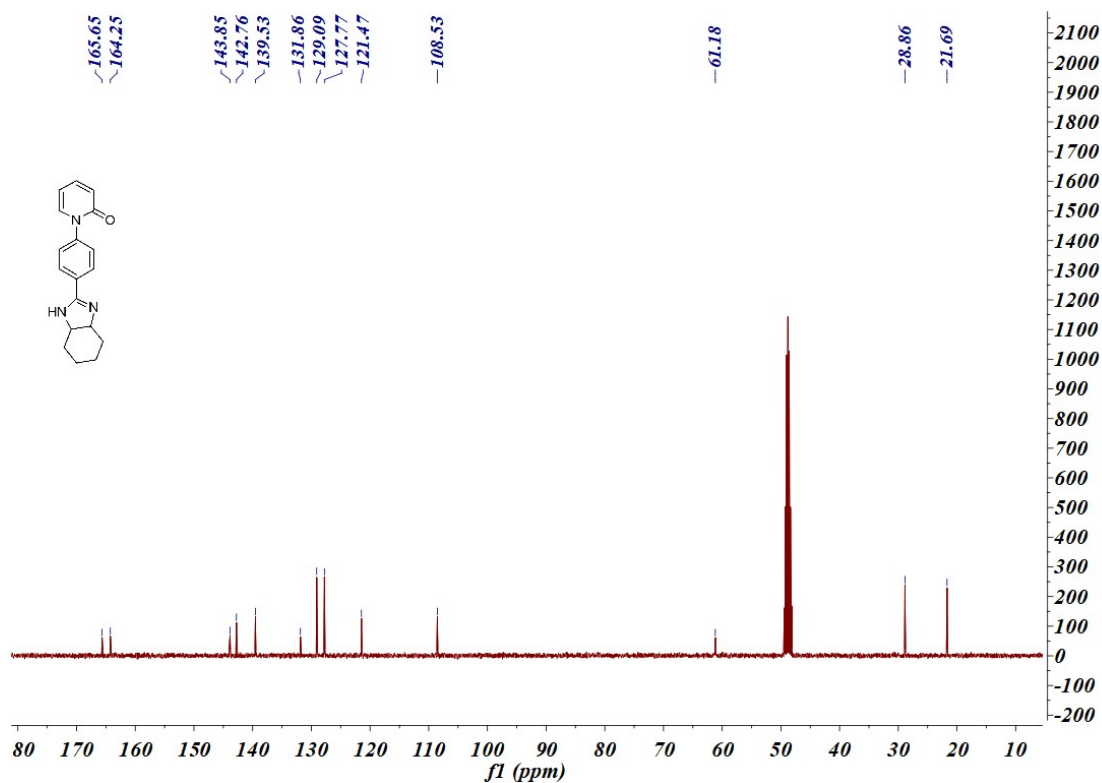

Note: The number of carbons Sp<sup>3</sup> for the <sup>13</sup>C NMR of compound 5a-c, maybe because of the high frequency interconversion on both sides of the carbon-nitrogen double bond, the chemical environment of the carbon directly attached to the nitrogen atom is consistent. Therefore we're going to have fewer Sp<sup>3</sup> carbons.

Figure S6.5b-<sup>1</sup>H NMR

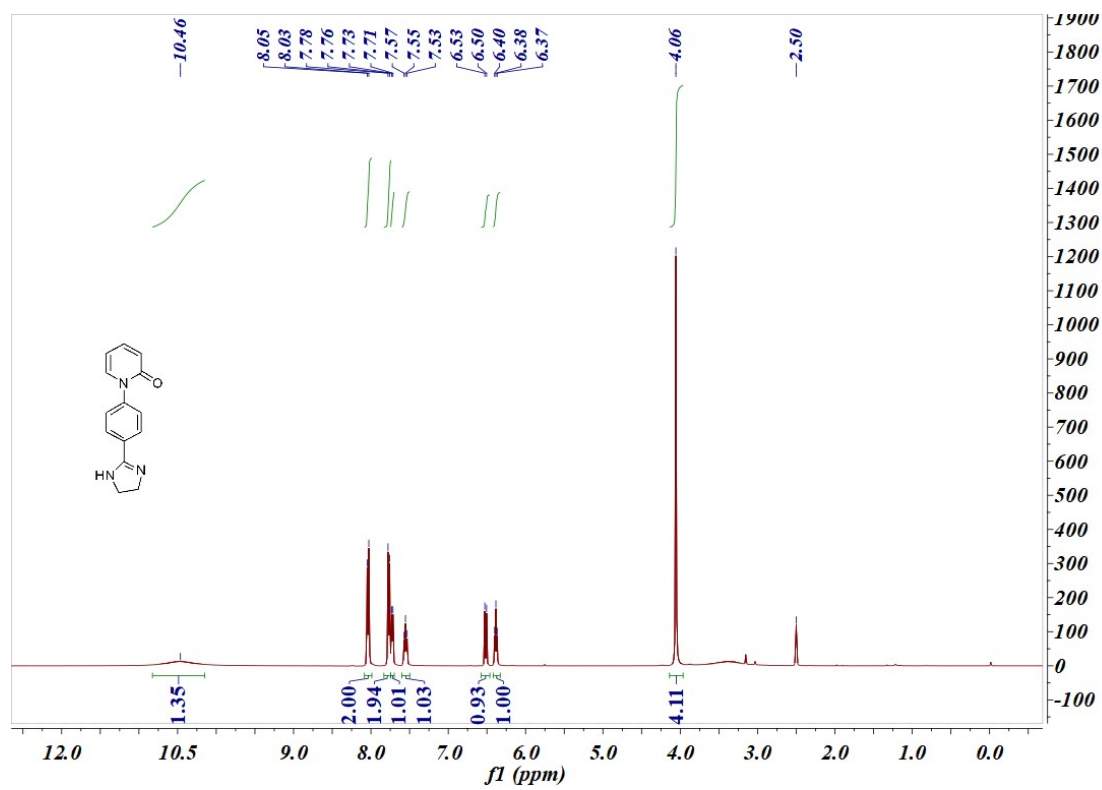

Figure S7.5b-<sup>13</sup>C NMR

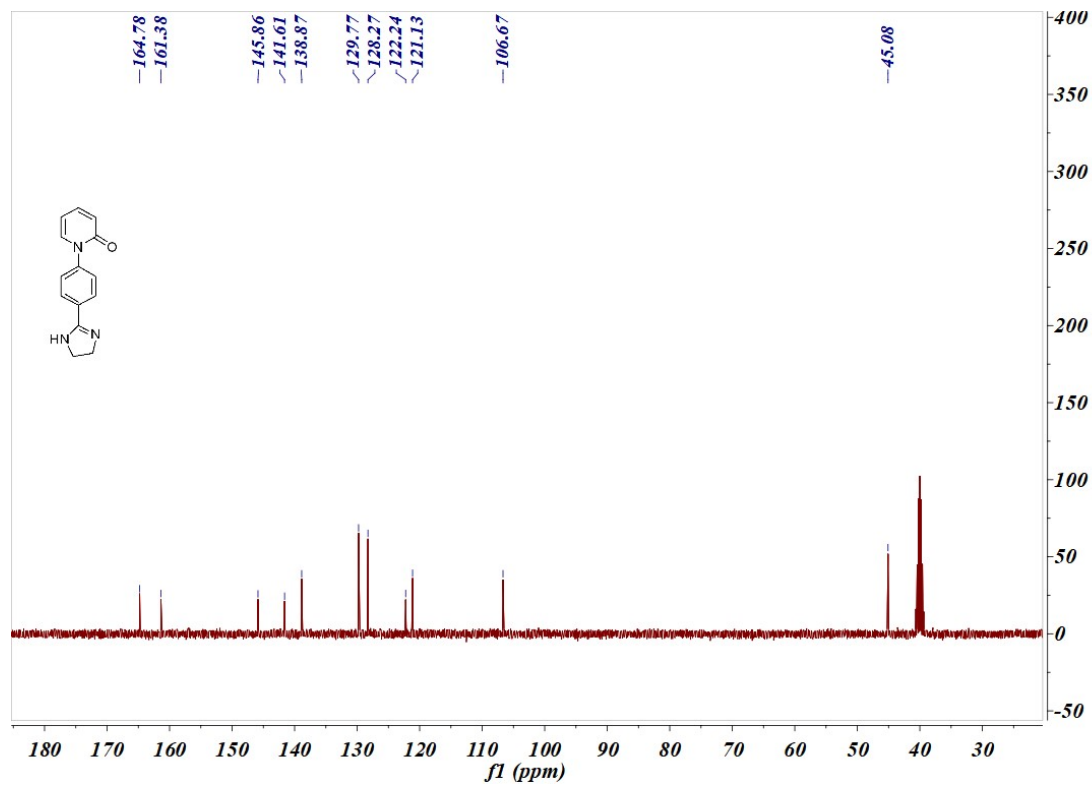

Figure S8.5c-<sup>1</sup>H NMR

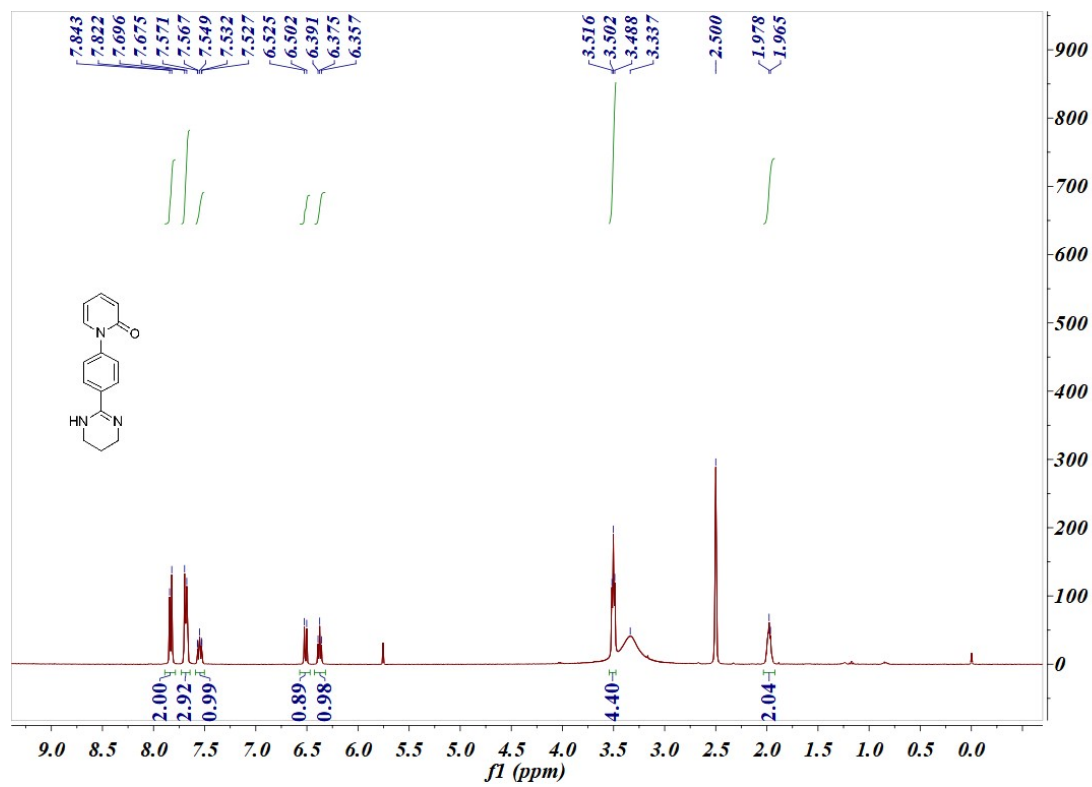

Figure S9.5c-<sup>13</sup>C NMR

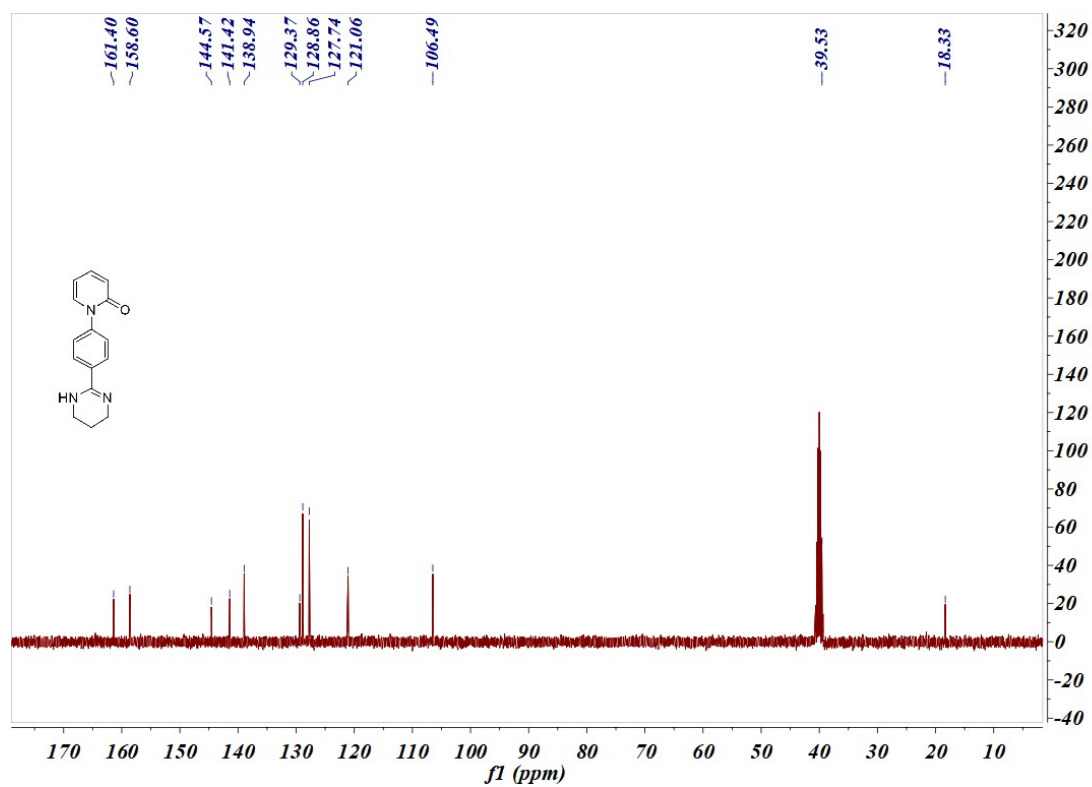

Figure S10.5d-<sup>1</sup>H NMR

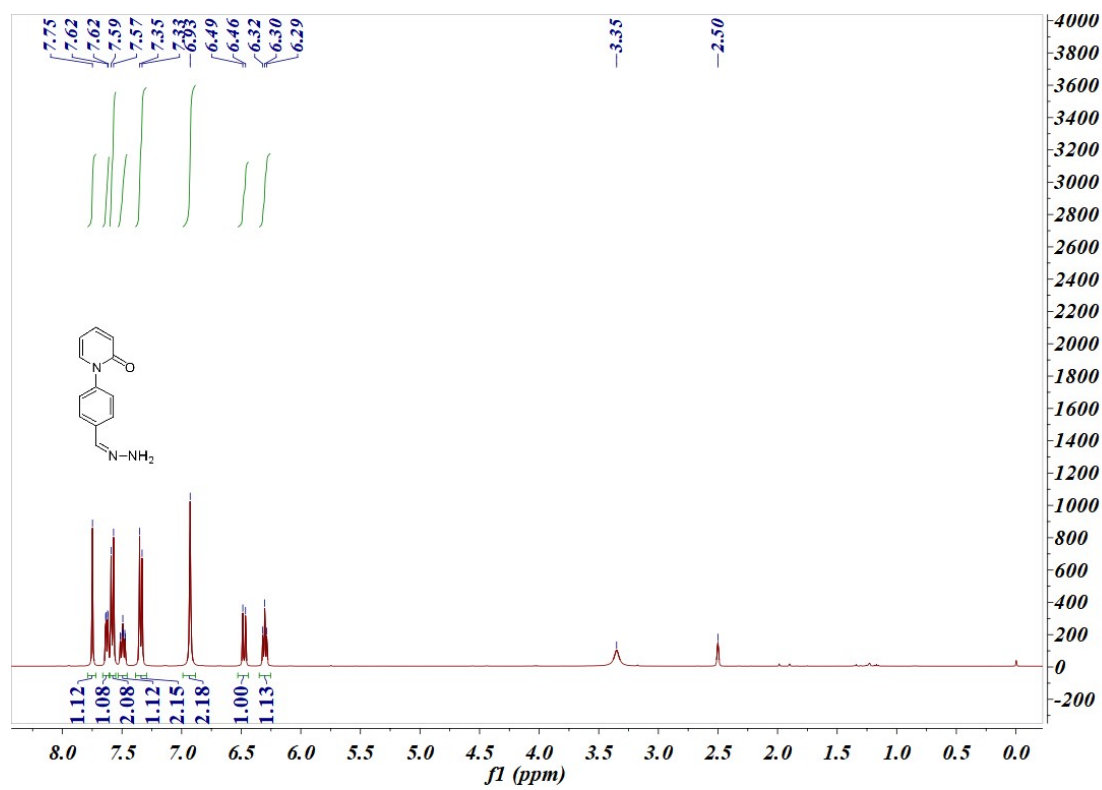

Figure S11.5d-<sup>13</sup>C NMR

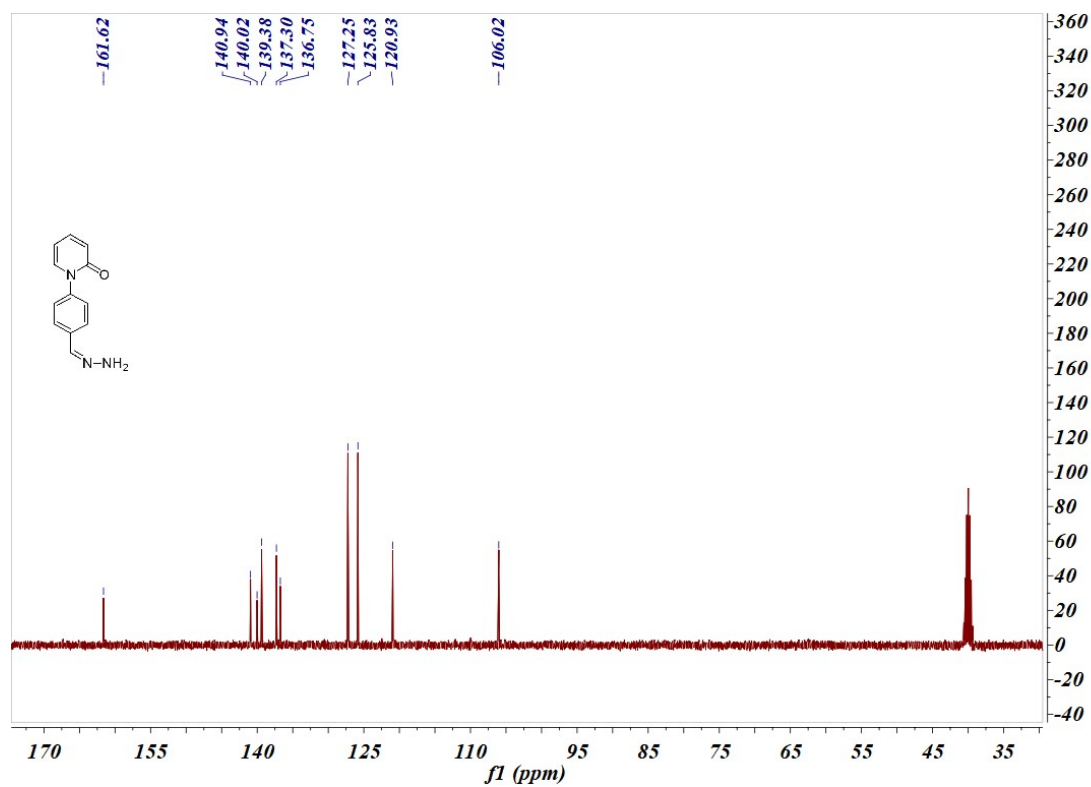



Figure S12.5e-<sup>1</sup>H NMR

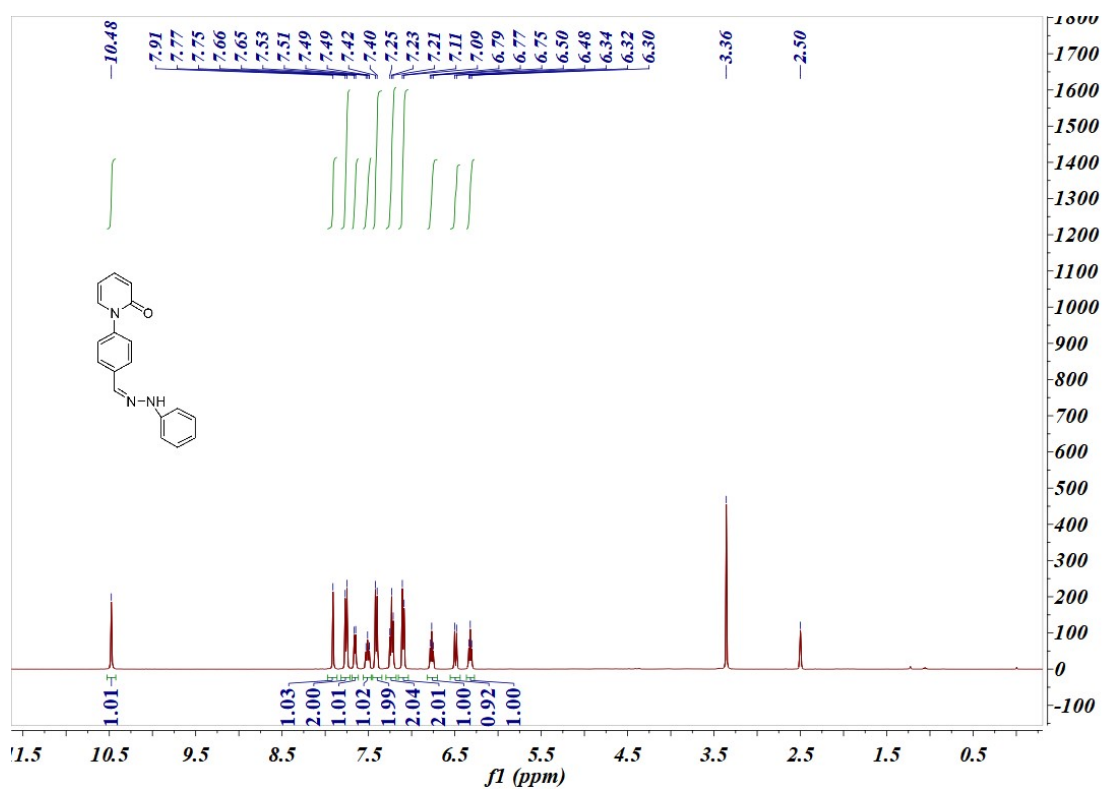

Figure S13.5e-<sup>13</sup>C NMR

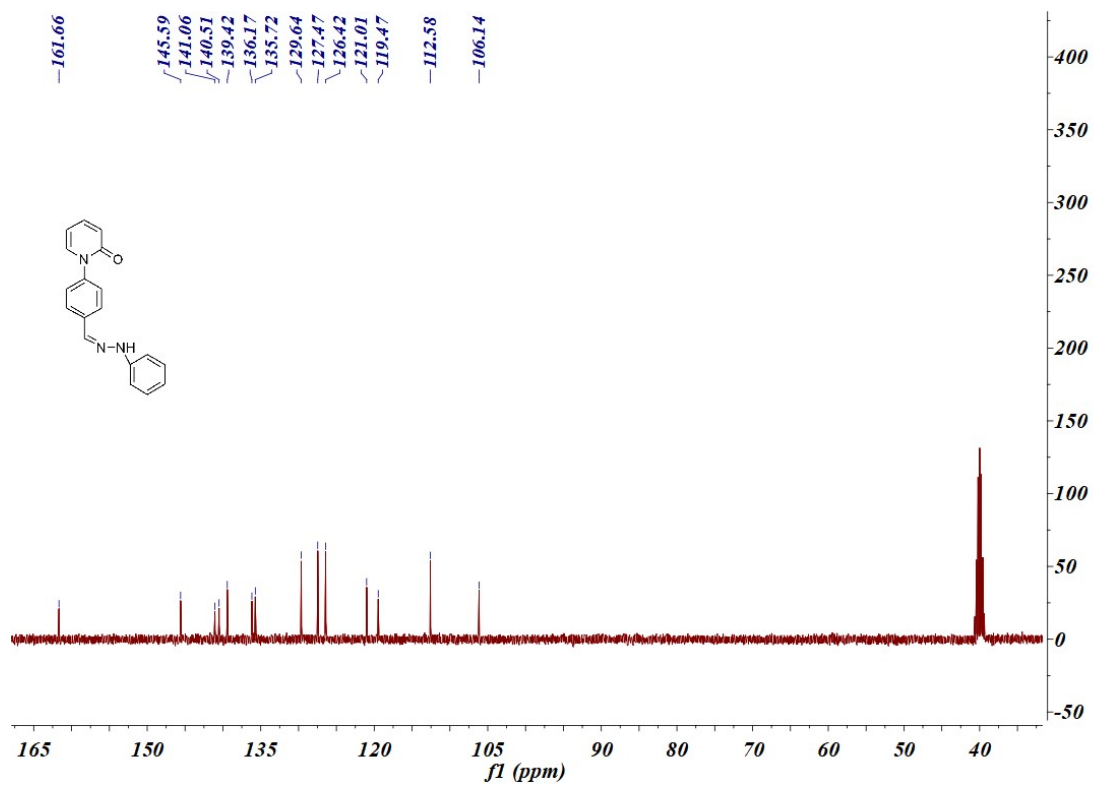

Figure S14.5f-<sup>1</sup>H NMR

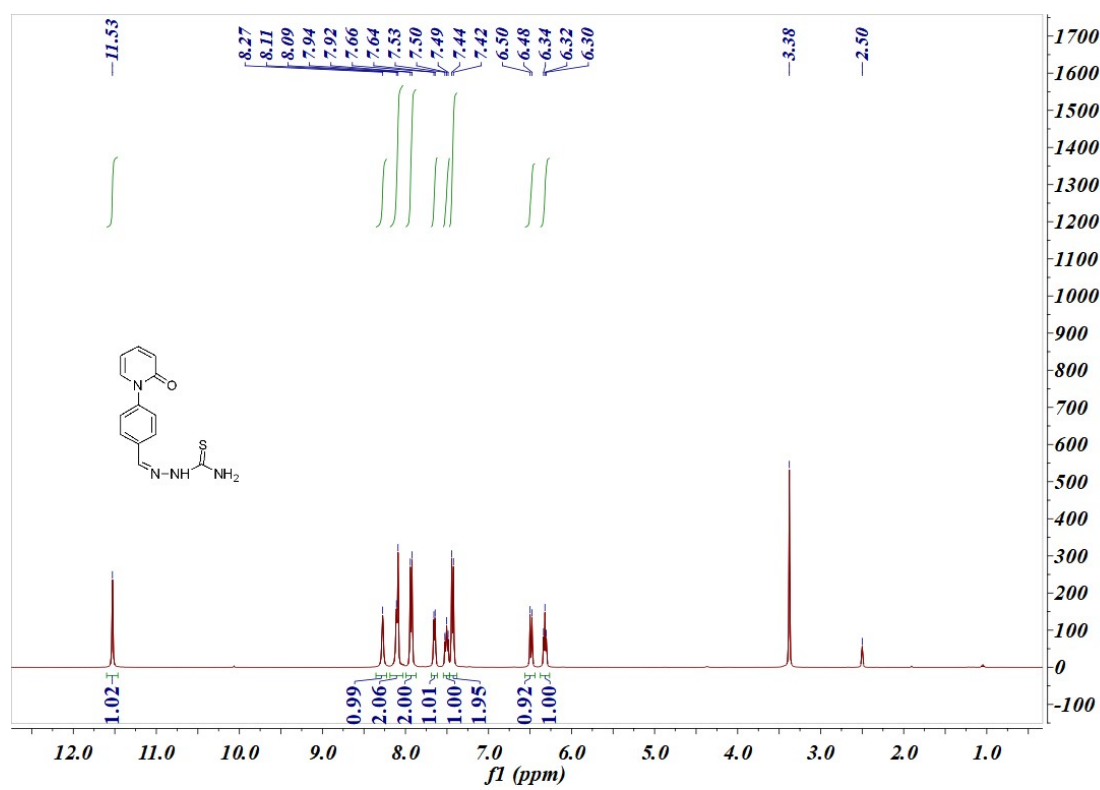

Figure S15.5f-<sup>13</sup>C NMR

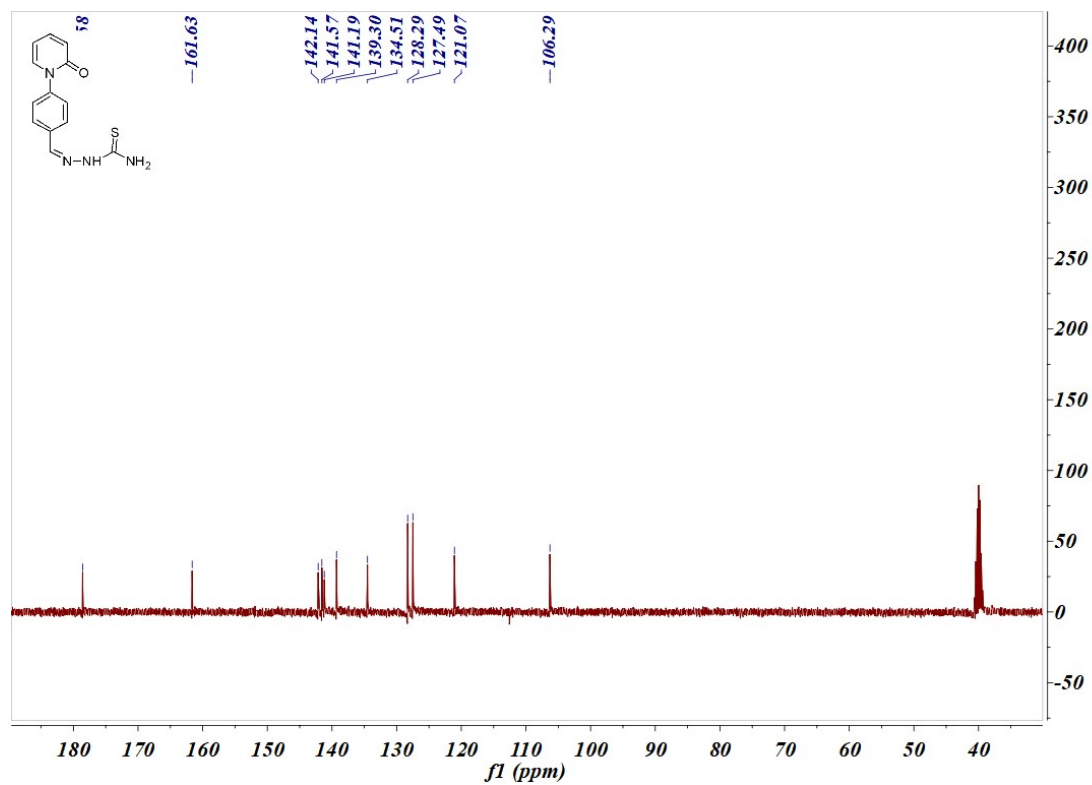

Figure S16.5g-<sup>1</sup>H NMR

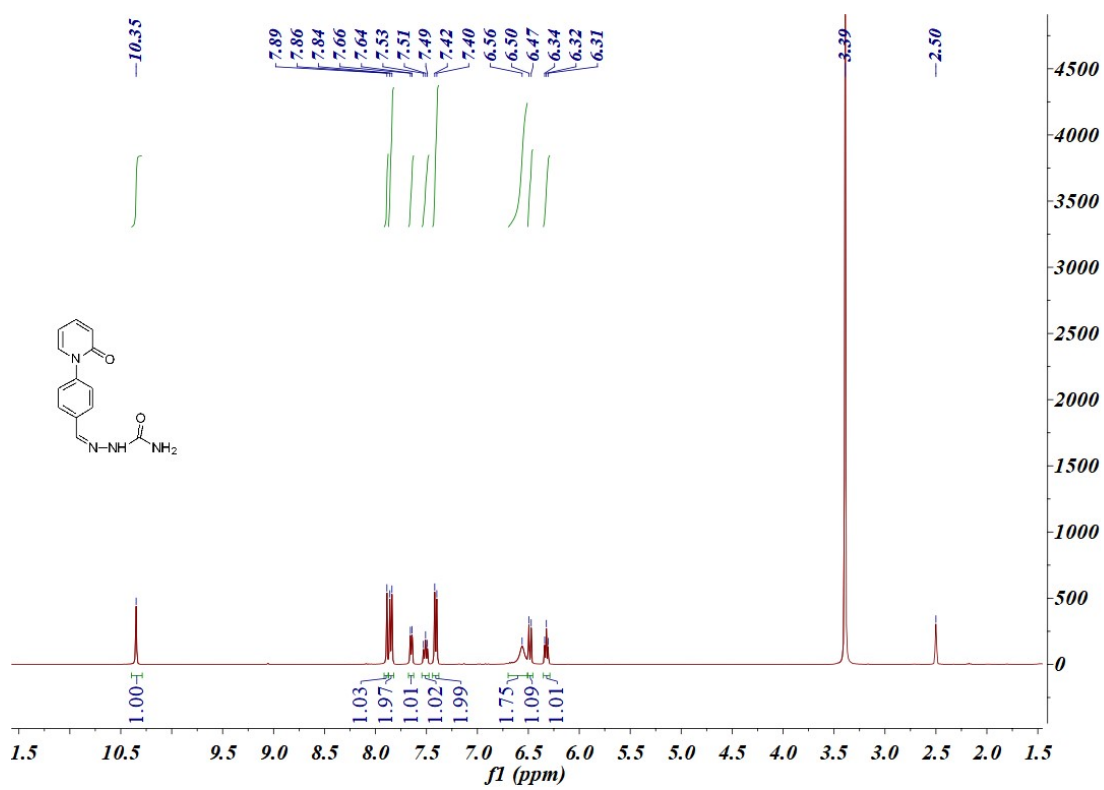

Figure S17.5g-<sup>13</sup>C NMR

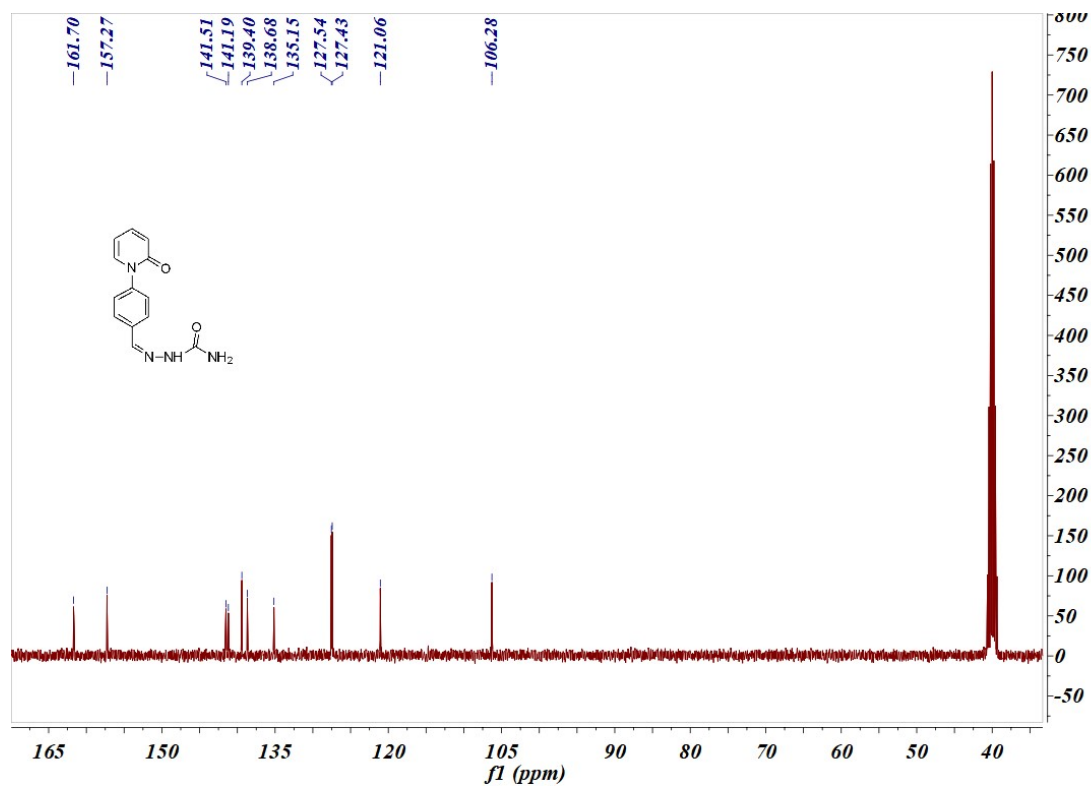

Figure S185a-HRMS

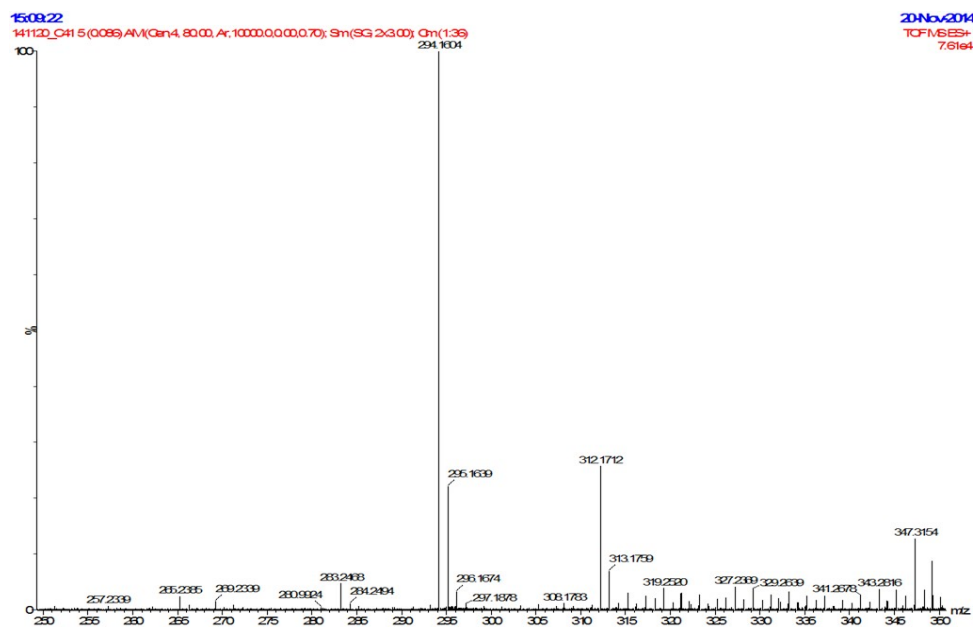

Figure S19.5b-HRMS

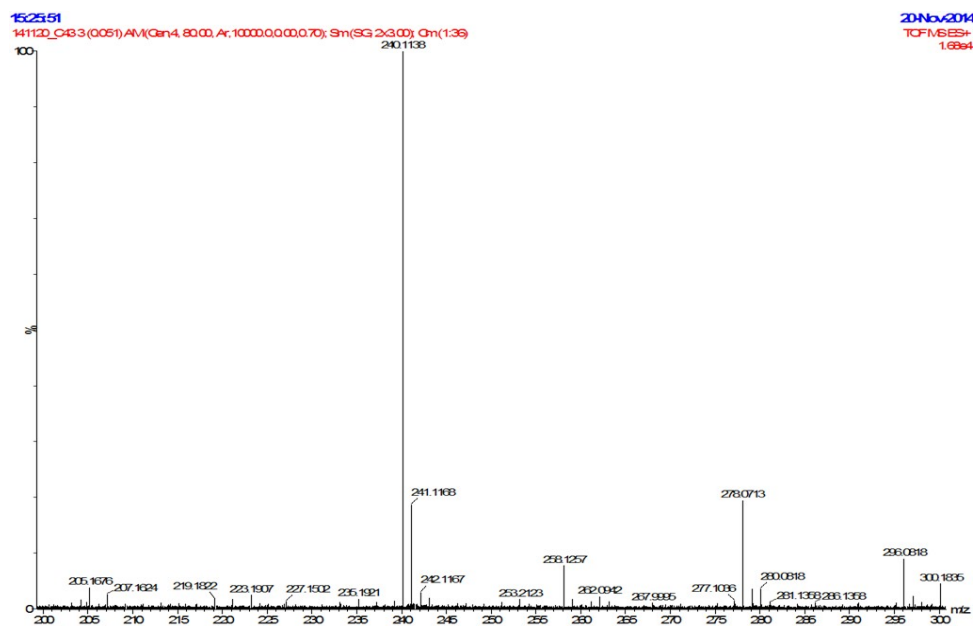

Figure S20.5c-HRMS

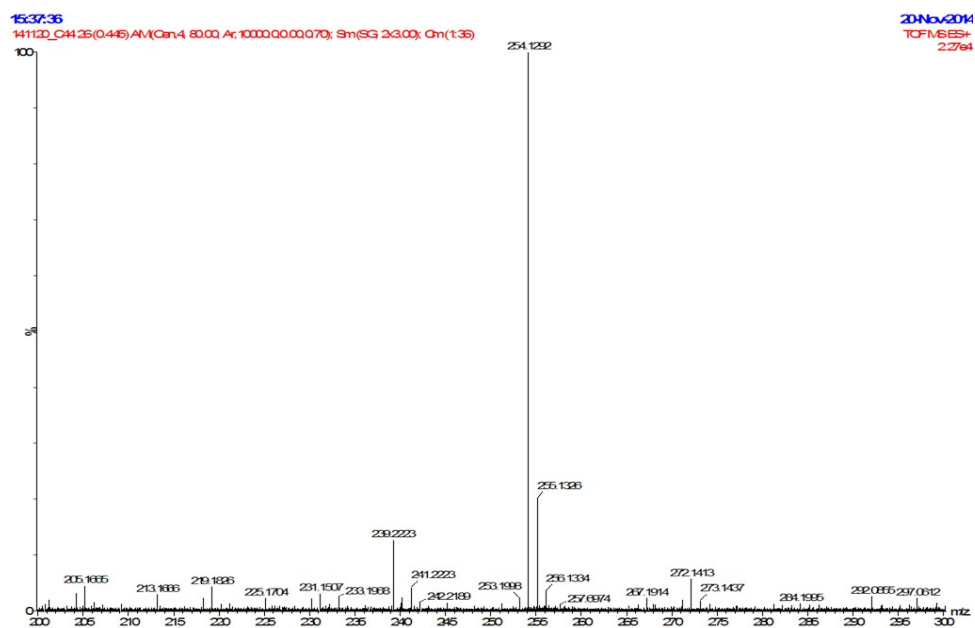

Figure S21.5d-HRMS

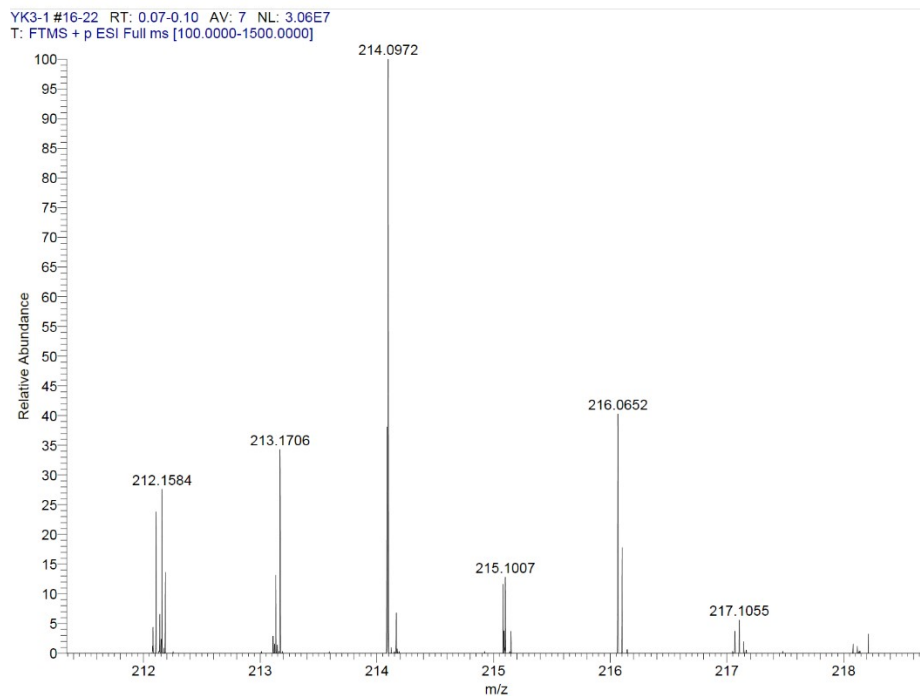

**Figure S22.5e-HRMS**

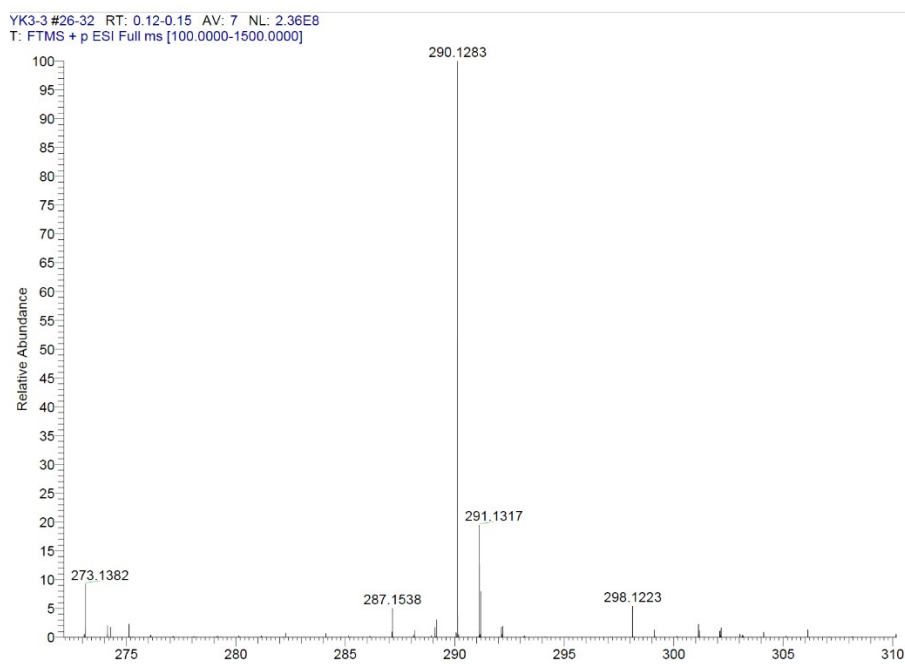

**Figure S23.5f-HRMS**

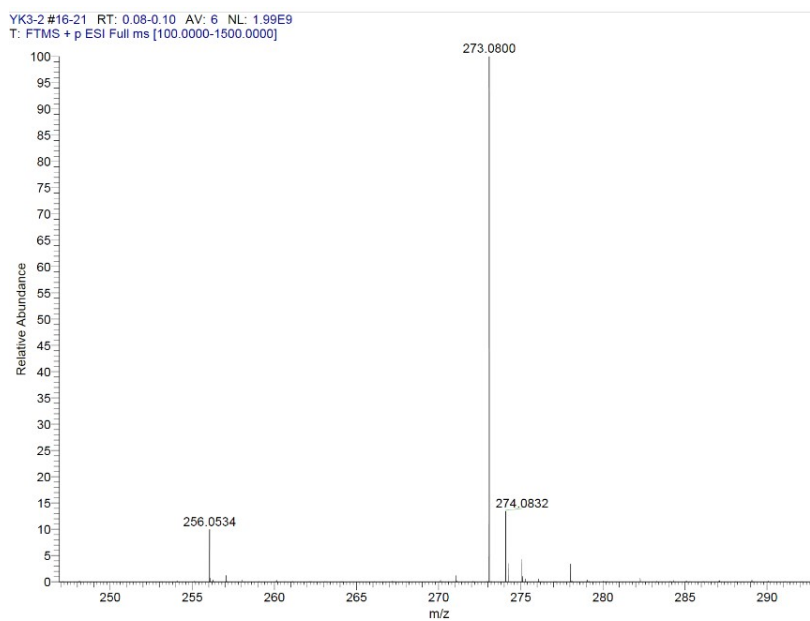

Figure S24.5g-HRMS

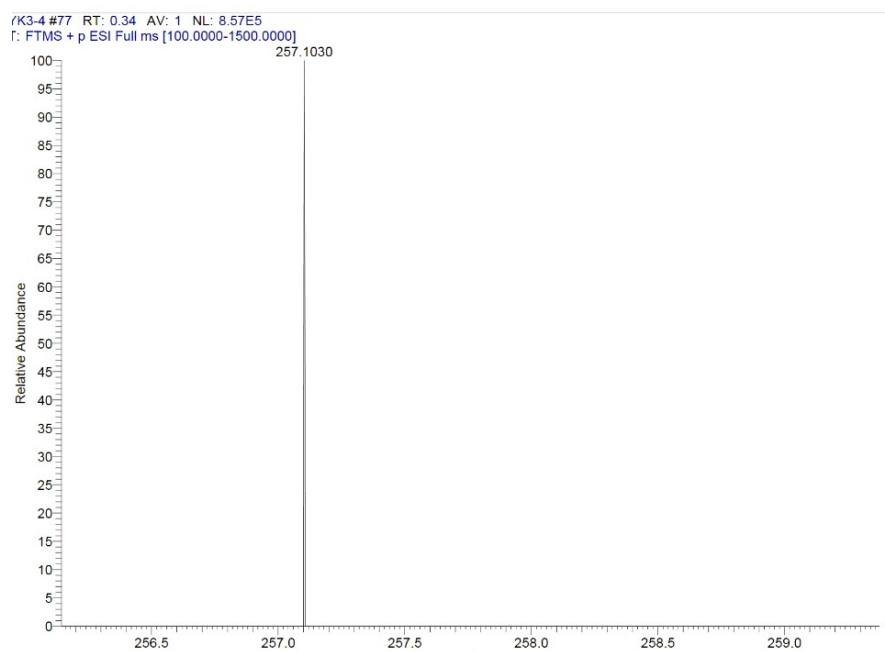

Supplement: d3md00072a1.pdf [file d3md00072a1.pdf]
